# Supplementary material for: Myocardial RNA Sequencing Reveals New Potential Therapeutic Targets in Heart Failure with Preserved Ejection Fraction
Source: MDPI journal article supplement (doi:10.3390/biomedicines11082131), 2023-07-28
Supplement: s1 [file s1]

1

2 **Table S1** – Clinical characteristics of HFpEF and Control groups.

| Patient | Group | Patients' characteristics |     |             |       | Comorbidities |     |      |     |     |    |     |    |      |
|---------|-------|---------------------------|-----|-------------|-------|---------------|-----|------|-----|-----|----|-----|----|------|
|         |       | Age                       | Sex | Weight (Kg) | BMI   | AMI           | ANG | Afib | PAD | CAD | HT | ANM | DM | COPD |
| NET_101 | HFpEF | 80                        | F   | 48          | 18,75 | x             | x   |      |     | x   | x  | x   |    |      |
| NET_103 | HFpEF | 65                        | M   | 66          | 23,67 |               | x   |      |     | x   | x  |     |    |      |
| NET_107 | HFpEF | 68                        | M   | 79          | 30,1  | x             |     |      |     | x   | x  |     |    |      |
| NET_112 | HFpEF | 78                        | F   | 85          | 34,05 |               | x   |      |     |     | x  | x   | x  |      |
| NET_113 | HFpEF | 74                        | F   | 75          | 30,43 |               | x   |      |     |     |    | x   | x  |      |
| NET_114 | HFpEF | 78                        | M   | 72          | 26,13 | x             |     |      | x   | x   | x  |     | x  | x    |
| Ctrl_3  | AS    | 58                        | F   | 109         | 45,36 |               |     | x    |     |     | x  |     | x  |      |
| Ctrl_4  | AS    | 50                        | F   | 116         | 38,75 |               |     | x    |     |     | x  |     |    |      |
| Ctrl_6  | AS    | 58                        | M   | 75          | 26,89 |               |     |      |     |     | x  |     |    |      |
| Ctrl_7  | AS    | 79                        | M   | 67          | 25,52 |               |     |      |     |     | x  |     | x  |      |

Legend: BMI-Body mass index; AMI – Acute myocardial infarction; ANG – Angina; Afib; Atrial fibrillation;

AS – Aortic stenosis; PAD – Peripheral artery disease; CAD – Carotid artery disease; HT – Hypertension; ANM – Anemia;

DM – Diabetes; COPD – Chronic obstructive pulmonary disease.
